# Supplementary material
Source: Springer Nature journal article supplement (https://www.springermedizin.de/resource/supplementary/12885_2011_2853_MOESM10_ESM.pdf/9462124)

**A**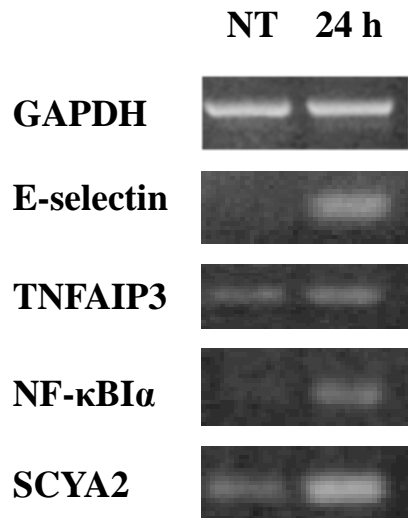**B**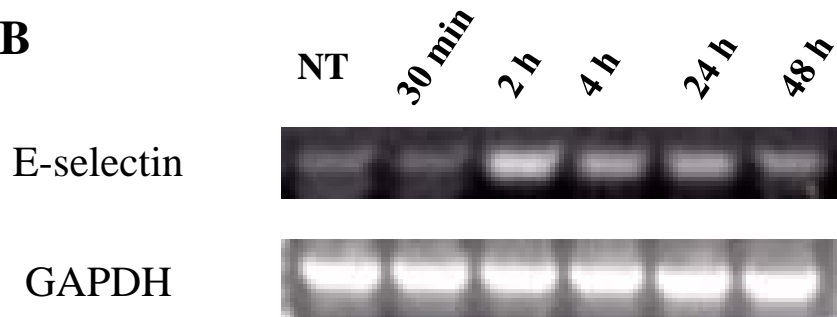**C**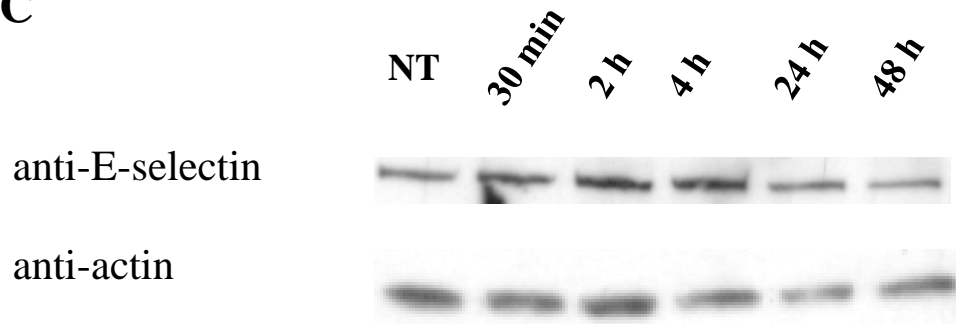

Supplement: MOESM10 [file 9462124]
